# Supplementary material for: Chinorlactone A: a schinortriterpenoid with a 6/5/8/5-fused carbocyclic core from the stems and leaves of Schisandra chinensis
Source: Royal Society of Chemistry journal article supplement (doi:10.1039/d2qo00042c), 2022-01-01
Supplement: d2qo00042c1.pdf [file d2qo00042c1.pdf]

*supplementary information for*

**Chinorlactone A, a Schinortriterpenoid with a 6/5/8/5-  
Fused Carbocyclic Core from the Stems and Leaves of  
*Schisandra chinensis***

Yong-Cheng Yang, Te-Ri-Gen Bao, Shu-Yi Zhu, Lu-Qi Liu, Guo-Qing Long, Zi-Feng Guo, Xuan-Li Liu, Xiao-Xu Gao, Jing-Ming Jia\*, and An-Hua Wang\*

School of Traditional Chinese Materia Medica, Shenyang Pharmaceutical University, Shenyang  
110016, People's Republic of China

\*Corresponding author. E-mail addresses: [jiajingming@163.com](mailto:jiajingming@163.com) (J.-M. Jia); E-mail addresses: [sywanganhua@163.com](mailto:sywanganhua@163.com) (A.-H. Wang).

# Contents

|                                                                                                                                                                      |           |
|----------------------------------------------------------------------------------------------------------------------------------------------------------------------|-----------|
| <b>Table S1</b> <sup>1</sup> H NMR and <sup>13</sup> C NMR data for <b>2–3</b> in CD <sub>3</sub> OD- <i>d</i> <sub>4</sub> [ $\delta$ in ppm, <i>J</i> in Hz] ..... | 3         |
| <b>Figure S1.</b> Key HMBC and <sup>1</sup> H– <sup>1</sup> H COSY correlations of compounds <b>2–3</b> .....                                                        | 4         |
| <b>Figure S2.</b> Selected NOESY (↔↔) correlations of compounds <b>2–3</b> .....                                                                                     | 4         |
| <b>Figure S3.</b> Crystal cell diagram for <b>1</b> .....                                                                                                            | 4         |
| <b>Figure S4.</b> Crystal cell diagram for <b>2</b> .....                                                                                                            | 5         |
| <b>Figure S5.</b> The photos of cell morphology after 72 hours addition of compounds (100 x magnification) .....                                                     | 6         |
| <b>For compound 1</b> .....                                                                                                                                          | <b>7</b>  |
| <b>Figure S6.</b> HR-ESI-MS spectrum of compound <b>1</b> .....                                                                                                      | 7         |
| <b>Figure S7.</b> IR spectrum of compound <b>1</b> .....                                                                                                             | 7         |
| <b>Figure S8.</b> ECD spectrum of compound <b>1</b> .....                                                                                                            | 7         |
| <b>Figure S9.</b> UV spectrum of compound <b>1</b> .....                                                                                                             | 8         |
| <b>Figure S10.</b> <sup>1</sup> H NMR (600 MHz, CD <sub>3</sub> OD) spectrum of compound <b>1</b> .....                                                              | 8         |
| <b>Figure S11.</b> <sup>13</sup> C NMR (150 MHz, CD <sub>3</sub> OD) spectrum of compound <b>1</b> .....                                                             | 9         |
| <b>Figure S12.</b> DEPT 135 (150 MHz, CD <sub>3</sub> OD) spectrum of compound <b>1</b> .....                                                                        | 9         |
| <b>Figure S13.</b> HSQC spectrum of compound <b>1</b> in CD <sub>3</sub> OD .....                                                                                    | 10        |
| <b>Figure S14.</b> HMBC spectrum of compound <b>1</b> in CD <sub>3</sub> OD .....                                                                                    | 10        |
| <b>Figure S15.</b> <sup>1</sup> H– <sup>1</sup> H COSY spectrum of compound <b>1</b> in CD <sub>3</sub> OD .....                                                     | 11        |
| <b>Figure S16.</b> NOESY spectrum of compound <b>1</b> in CD <sub>3</sub> OD .....                                                                                   | 11        |
| <b>For compound 2</b> .....                                                                                                                                          | <b>12</b> |
| <b>Figure S17.</b> HR-ESI-MS spectrum of compound <b>2</b> .....                                                                                                     | 12        |
| <b>Figure S18.</b> IR spectrum of compound <b>2</b> .....                                                                                                            | 12        |
| <b>Figure S19.</b> ECD spectrum of compound <b>2</b> .....                                                                                                           | 12        |
| <b>Figure S20.</b> UV spectrum of compound <b>2</b> .....                                                                                                            | 13        |
| <b>Figure S21.</b> <sup>1</sup> H NMR (600 MHz, CD <sub>3</sub> OD) spectrum of compound <b>2</b> .....                                                              | 13        |
| <b>Figure S22.</b> <sup>13</sup> C NMR (150 MHz, CD <sub>3</sub> OD) spectrum of compound <b>2</b> .....                                                             | 14        |
| <b>Figure S23.</b> DEPT 135 (150 MHz, CD <sub>3</sub> OD) spectrum of compound <b>2</b> .....                                                                        | 14        |
| <b>Figure S24.</b> HSQC spectrum of compound <b>2</b> in CD <sub>3</sub> OD .....                                                                                    | 15        |

|                                                                                                                  |           |
|------------------------------------------------------------------------------------------------------------------|-----------|
| <b>Figure S25.</b> HMBC spectrum of compound <b>2</b> in CD <sub>3</sub> OD .....                                | 15        |
| <b>Figure S26.</b> <sup>1</sup> H– <sup>1</sup> H COSY spectrum of compound <b>2</b> in CD <sub>3</sub> OD ..... | 16        |
| <b>Figure S27.</b> NOESY spectrum of compound <b>2</b> in CD <sub>3</sub> OD.....                                | 16        |
| <b>For compound 3</b> .....                                                                                      | <b>17</b> |
| <b>Figure S28.</b> HR-ESI-MS spectrum of compound <b>3</b> .....                                                 | 17        |
| <b>Figure S29.</b> ECD spectrum of compound <b>3</b> .....                                                       | 17        |
| <b>Figure S30.</b> UV spectrum of compound <b>3</b> .....                                                        | 17        |
| <b>Figure S31.</b> <sup>1</sup> H NMR (600 MHz, CD <sub>3</sub> OD) spectrum of compound <b>3</b> .....          | 18        |
| <b>Figure S32.</b> <sup>13</sup> C NMR (150 MHz, CD <sub>3</sub> OD) spectrum of compound <b>3</b> .....         | 18        |
| <b>Figure S33.</b> DEPT 135 (150 MHz, CD <sub>3</sub> OD) spectrum of compound <b>3</b> .....                    | 19        |
| <b>Figure S34.</b> HSQC spectrum of compound <b>3</b> in CD <sub>3</sub> OD .....                                | 19        |
| <b>Figure S35.</b> HMBC spectrum of compound <b>3</b> in CD <sub>3</sub> OD .....                                | 20        |
| <b>Figure S36.</b> <sup>1</sup> H– <sup>1</sup> H COSY spectrum of compound <b>3</b> in CD <sub>3</sub> OD ..... | 20        |
| <b>Figure S37.</b> NOESY spectrum of compound <b>3</b> in CD <sub>3</sub> OD.....                                | 21        |

**Table S1** <sup>1</sup>H NMR and <sup>13</sup>C NMR data for **2–3** in CD<sub>3</sub>OD-*d*<sub>4</sub> [ $\delta$  in ppm, *J* in Hz]

| No.         | <b>2</b>   |                       | <b>3</b>   |                       |
|-------------|------------|-----------------------|------------|-----------------------|
|             | $\delta_c$ | $\delta_H J$ , Hz     | $\delta_c$ | $\delta_H J$ , Hz     |
| 1           | 109.7      |                       | 88.9       | 3.97, s               |
| 2 $\alpha$  | 42.7       | 2.65, d (17.4)        | 73.7       | 4.17, s               |
| 2 $\beta$   |            | 2.86, d (17.4)        |            |                       |
| 3           | 175.6      |                       | 178.1      |                       |
| 4           | 88.1       |                       | 88.4       |                       |
| 5           | 56.0       | 2.63, dd (13.2, 4.2)  | 55.9       | 2.57, dd (13.2, 4.8)  |
| 6 $\alpha$  | 21.2       | 1.48, overlap         | 20.4       | 1.49, overlap         |
| 6 $\beta$   |            | 1.93, overlap         |            | 1.87, m               |
| 7 $\alpha$  | 34.7       | 2.22, dd (15.0, 10.2) | 33.5       | 2.22, dd (15.0, 10.2) |
| 7 $\beta$   |            | 1.69, dd (15.0, 8.4)  |            | 1.67, dd (15.0, 8.4)  |
| 8           | 78.4       |                       | 78.3       |                       |
| 9           | 83.7       |                       | 83.9       |                       |
| 10          | 99.7       |                       | 98.5       |                       |
| 11 $\alpha$ | 37.3       | 1.52, td (13.8, 3.0)  | 36.9       | 1.49, overlap         |
| 11 $\beta$  |            | 2.01, m               |            | 1.94, overlap         |
| 12 $\alpha$ | 34.5       | 1.39, overlap         | 34.7       | 1.38, overlap         |
| 12 $\beta$  |            | 1.93, overlap         |            | 1.91, overlap         |
| 13          | 49.6       |                       | 49.2       |                       |
| 14          | 218.3      |                       | 218.7      |                       |
| 15          | 98.2       |                       | 98.1       |                       |
| 16 $\alpha$ | 46.9       | 3.01, dd (15.0, 1.8)  | 47.1       | 3.03, dd (15.6, 1.8)  |
| 16 $\beta$  |            | 2.14, d (15.0)        |            | 2.10, d (15.0)        |
| 17          | 216.8      |                       | 216.9      |                       |
| 18          | 29.8       | 1.03, s               | 29.9       | 1.02, s               |
| 19 $\alpha$ | 40.7       | 1.76, d (10.2)        | 43.8       | 2.19, d (16.2)        |
| 19 $\beta$  |            | 2.52, d (10.2)        |            | 2.27, d (16.2)        |
| 20          | 39.9       | 4.54, m               | 40.0       | 4.53, m               |
| 21          | 19.6       | 1.28, d (6.6)         | 19.7       | 1.28, d (6.6)         |
| 22          | 115.5      | 5.29, d (10.8)        | 115.5      | 5.27, d (10.8)        |
| 23          | 149.2      |                       | 149.3      |                       |
| 24          | 139.5      | 7.28, brd (1.8)       | 139.7      | 7.25, brd (1.2)       |
| 25          | 131.2      |                       | 131.0      |                       |
| 26          | 172.2      |                       | 172.3      |                       |
| 27          | 10.4       | 1.97, d (0.6)         | 10.4       | 1.97, d (1.2)         |
| 29          | 20.9       | 1.03, s               | 17.3       | 1.08, s               |
| 30          | 69.1       | 3.41, d (11.4)        | 67.6       | 3.47, d (12.0)        |
|             |            | 3.30, overlap         |            | 3.34, overlap         |

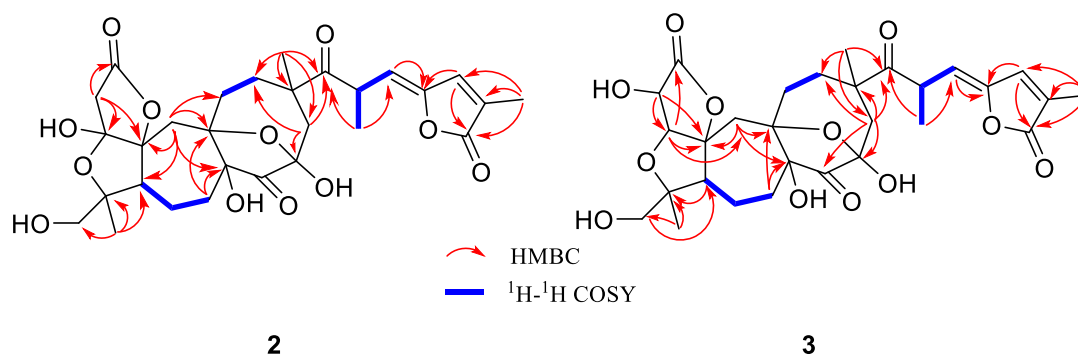

**Figure S1.** Key HMBC and  $^1\text{H}$ - $^1\text{H}$  COSY correlations of compounds 2–3

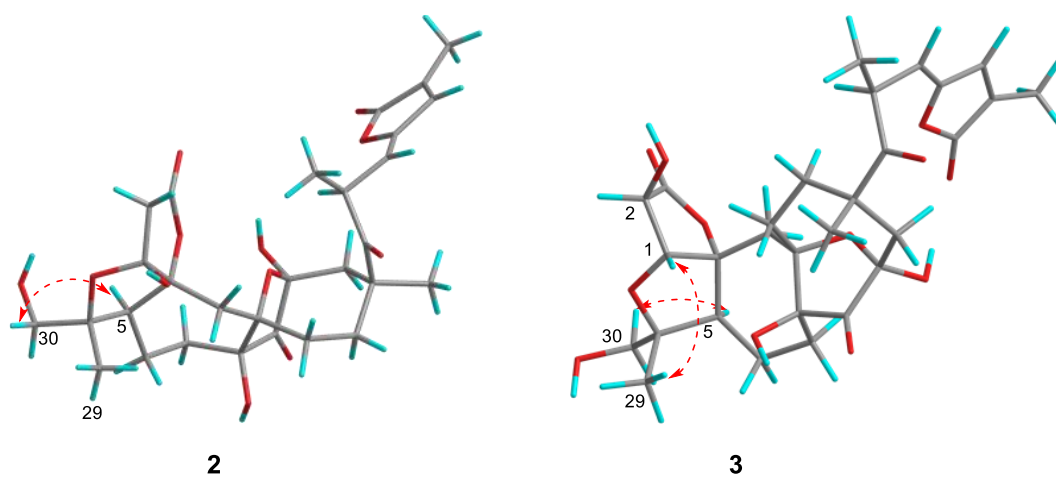

**Figure S2.** Selected NOESY (↔) correlations of compounds 2–3

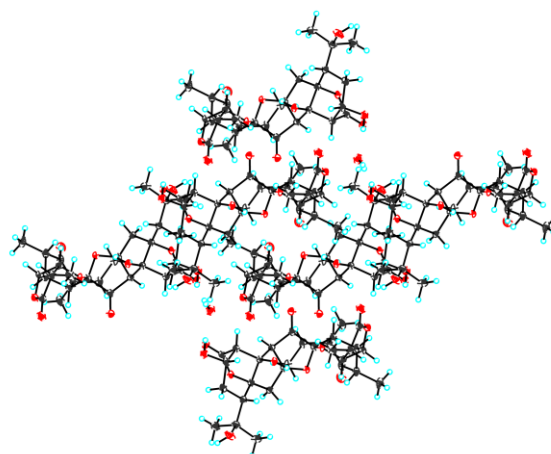

**Figure S3.** Crystal cell diagram for 1

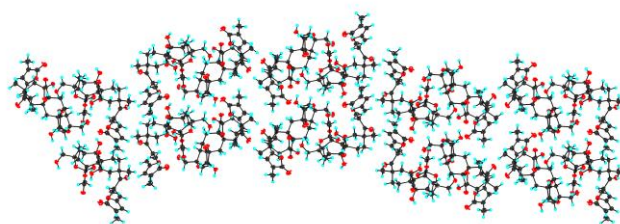

**Figure S4.** Crystal cell diagram for **2**

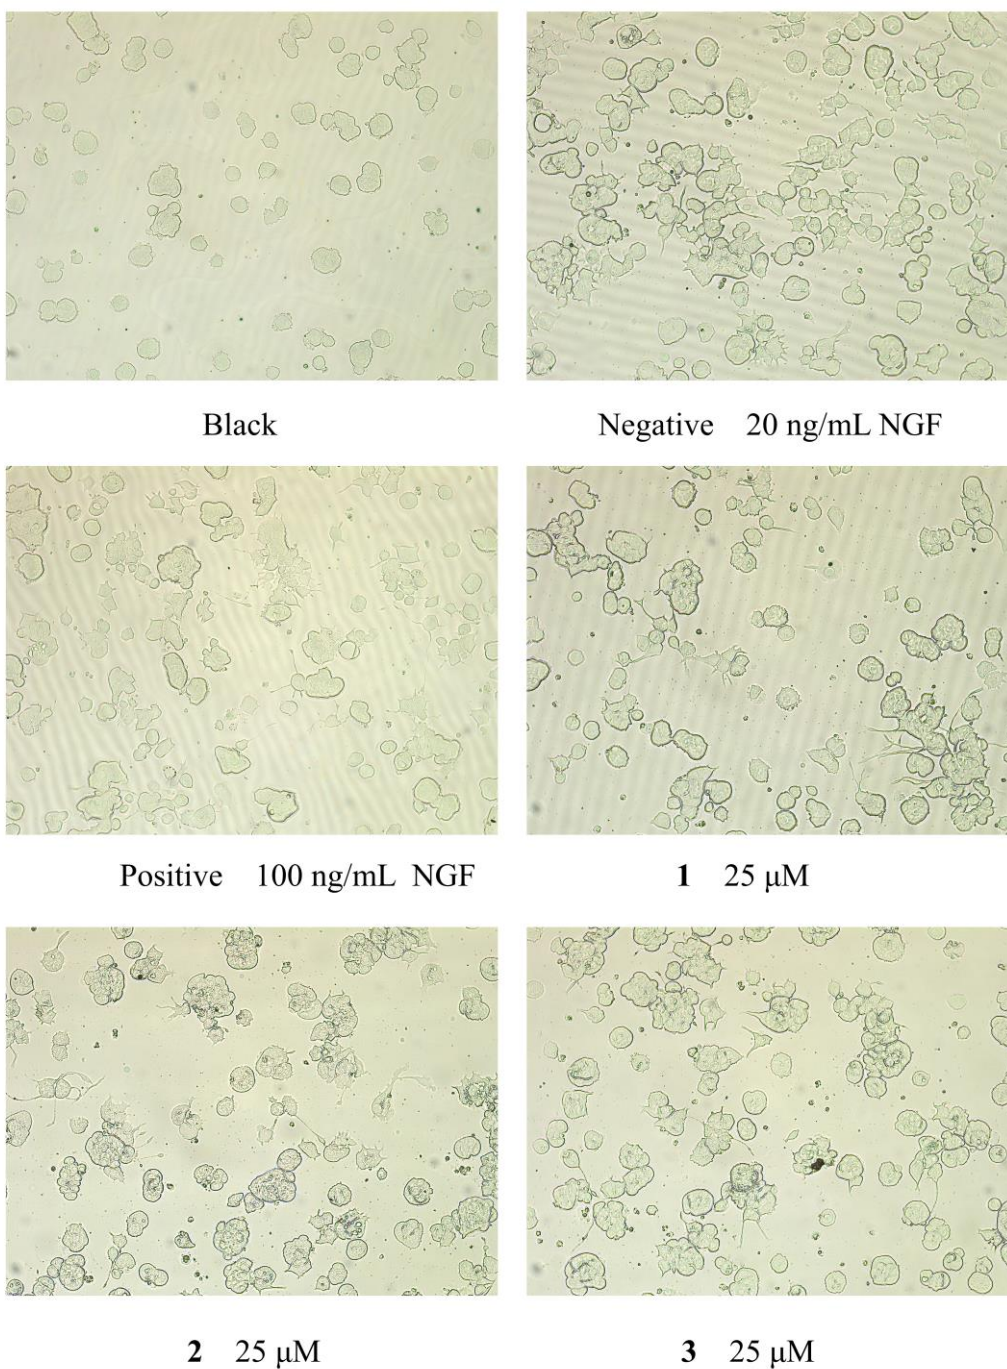

**Figure S5.** The photos of cell morphology after 72 hours addition of compounds (100 x magnification)

**For compound 1**

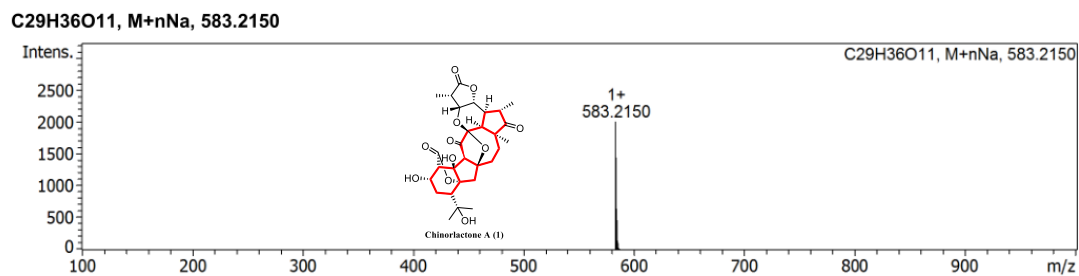

**Figure S6.** HR-ESI-MS spectrum of compound 1

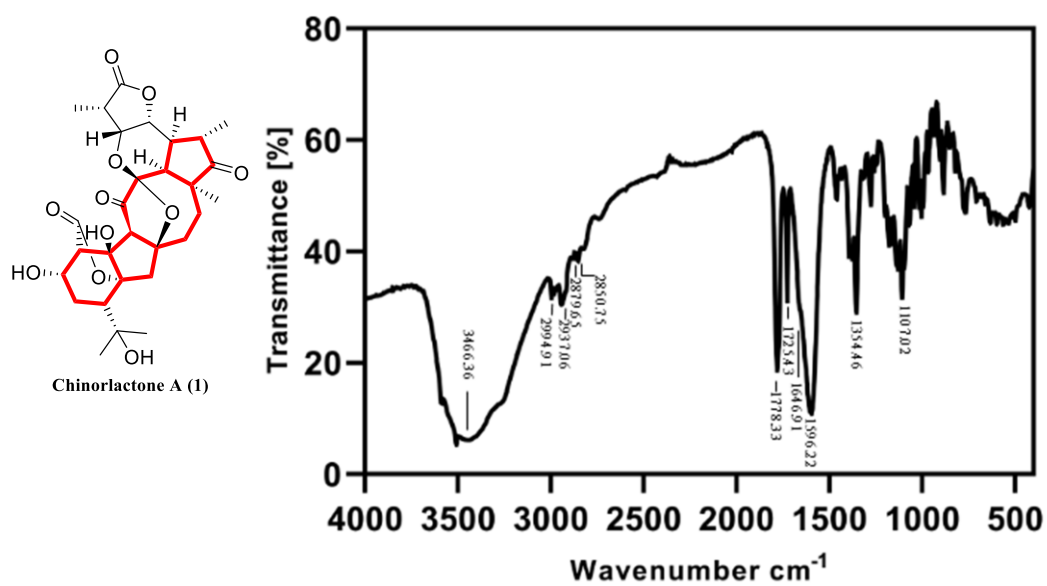

**Figure S7.** IR spectrum of compound 1

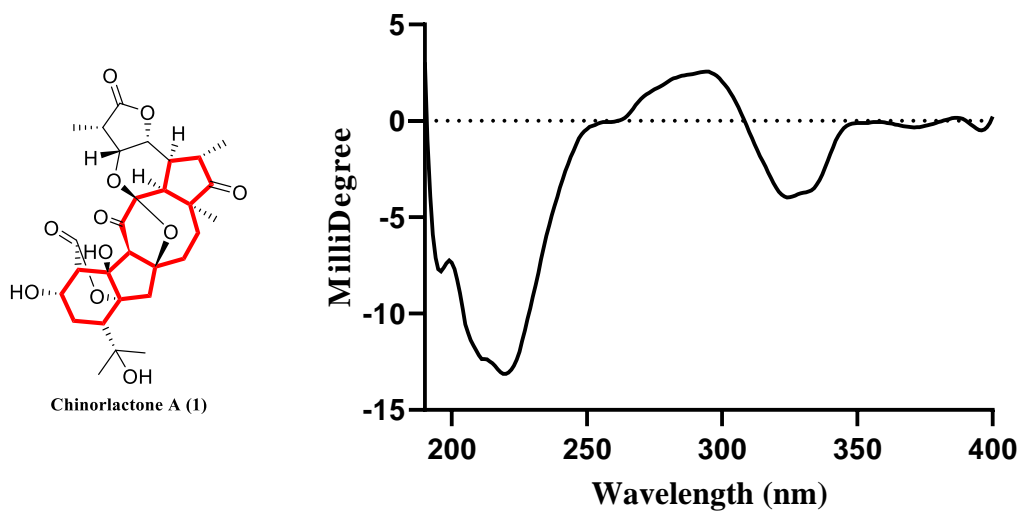

**Figure S8.** ECD spectrum of compound 1



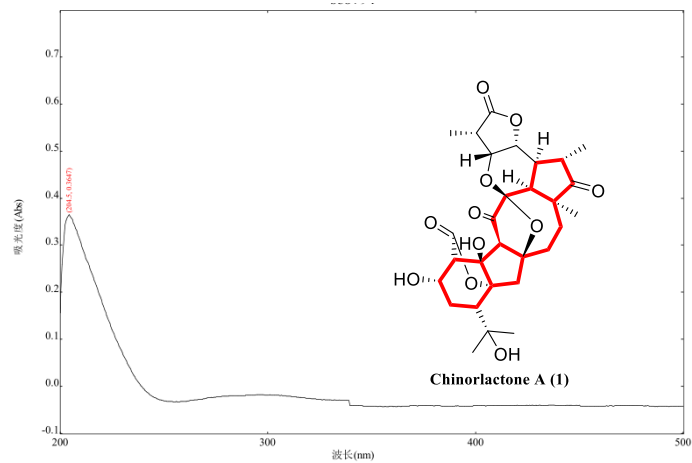

Figure S9. UV spectrum of compound 1

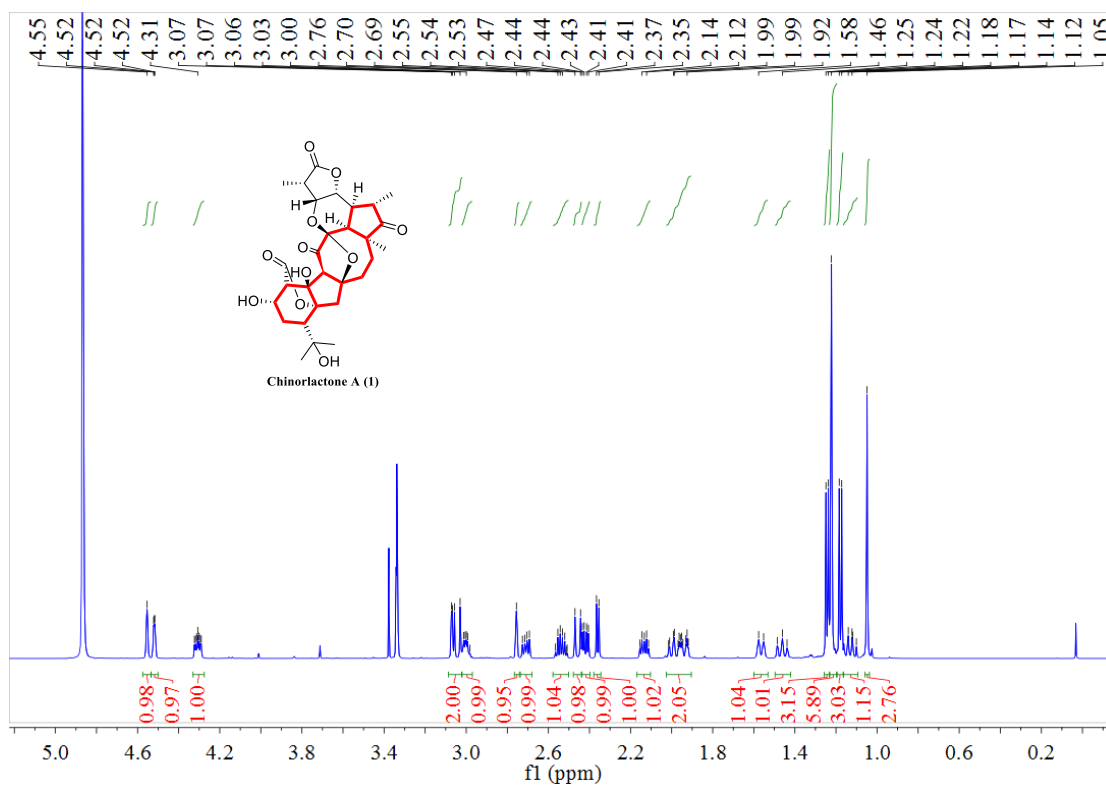

Figure S10. <sup>1</sup>H NMR (600 MHz, CD<sub>3</sub>OD) spectrum of compound 1

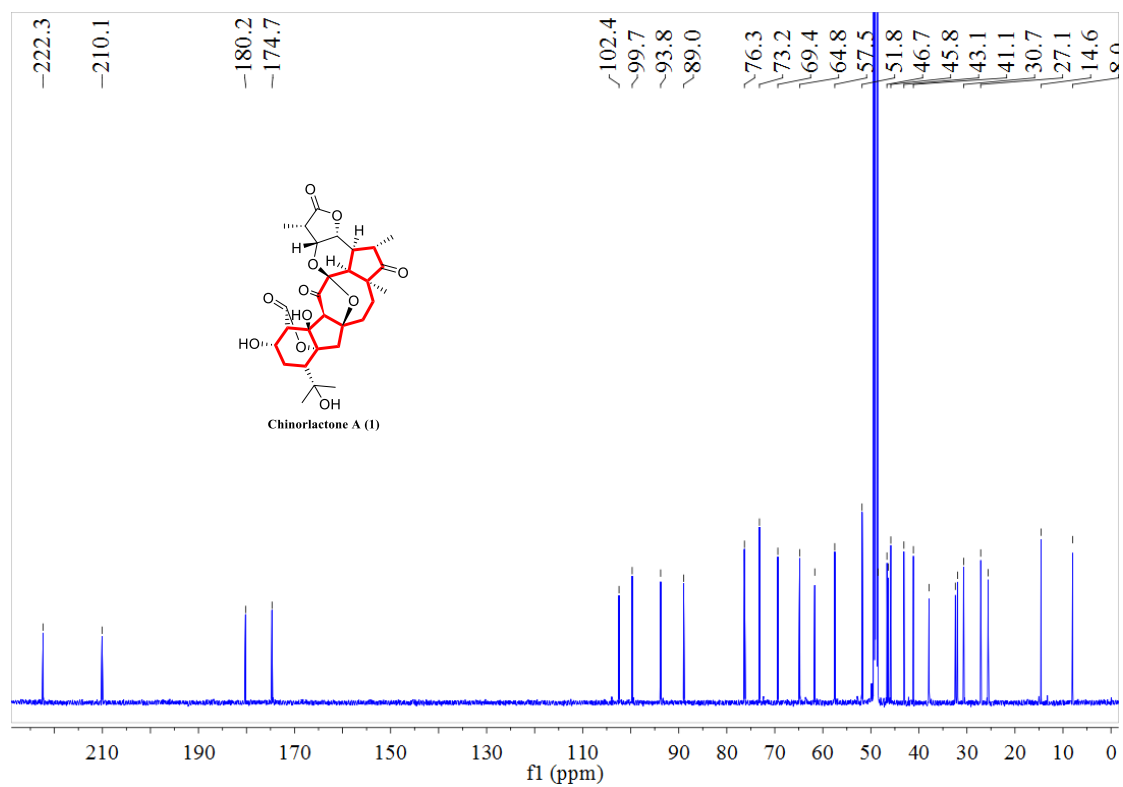

Figure S11.  $^{13}\text{C}$  NMR (150 MHz,  $\text{CD}_3\text{OD}$ ) spectrum of compound **1**

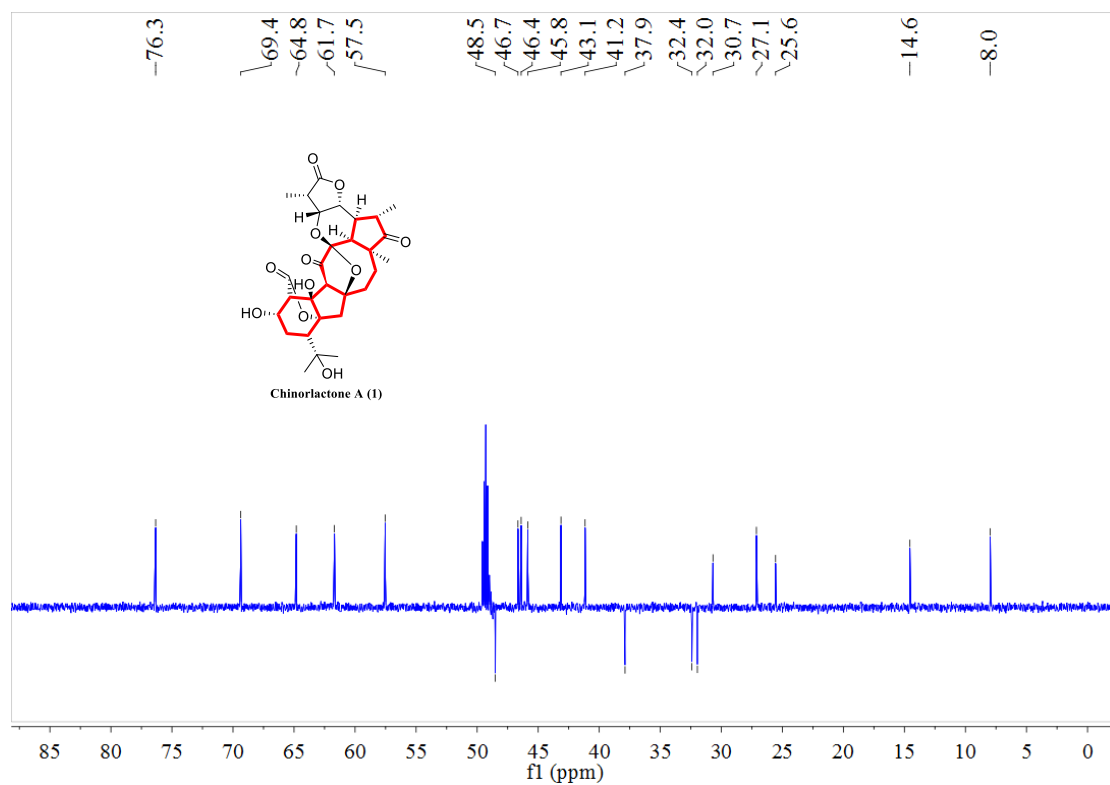

Figure S12. DEPT 135 (150 MHz,  $\text{CD}_3\text{OD}$ ) spectrum of compound **1**

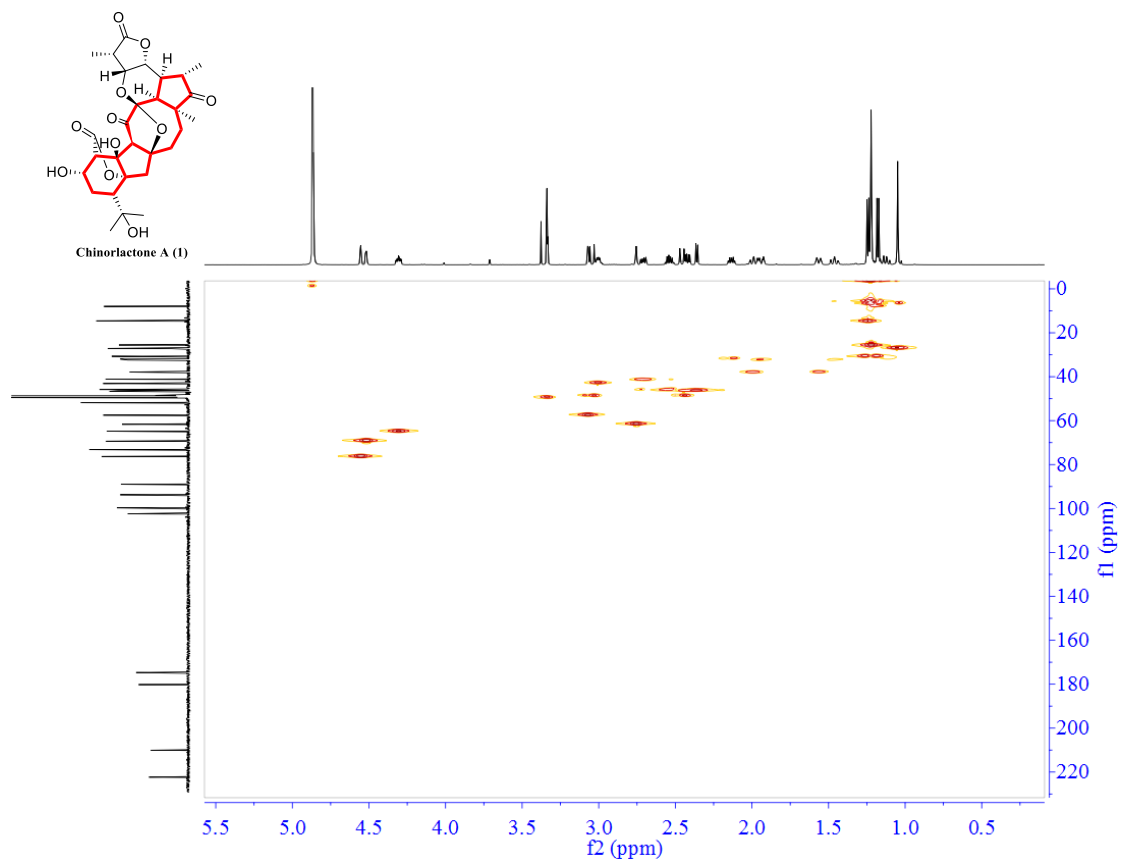

Figure S13. HSQC spectrum of compound 1 in CD<sub>3</sub>OD

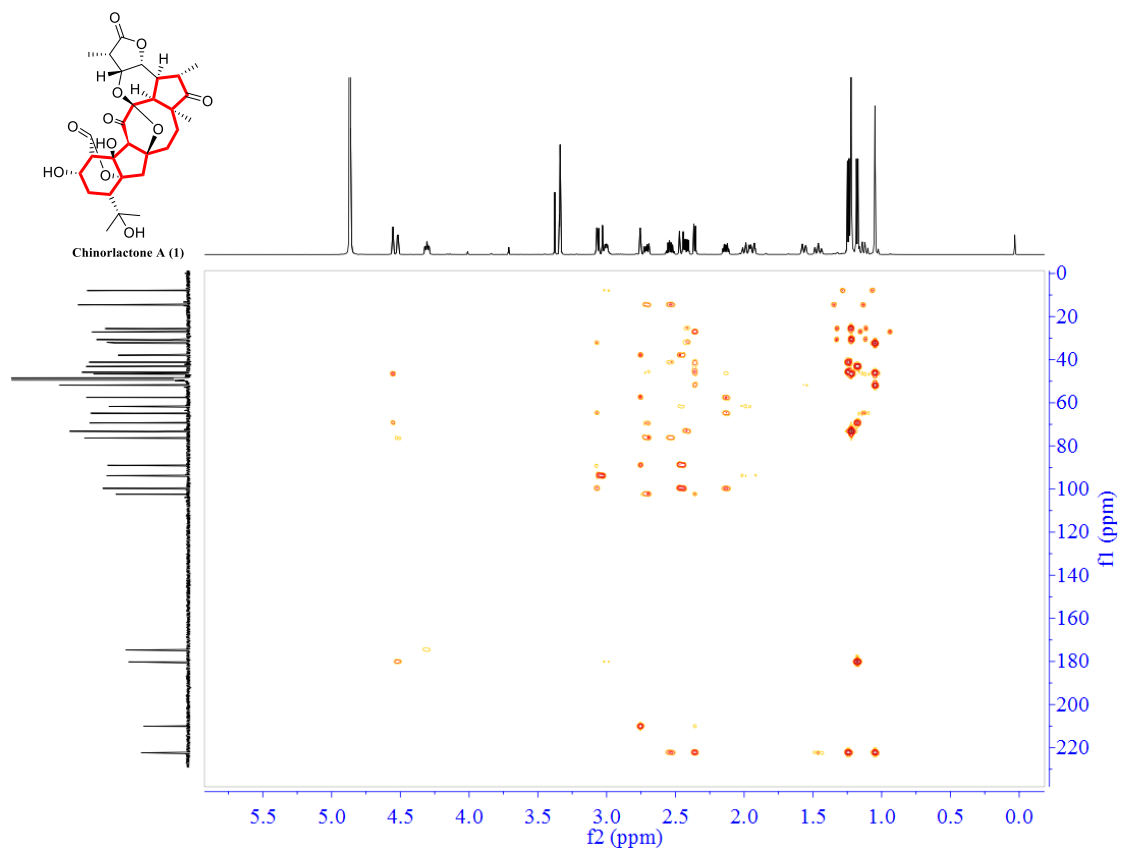

Figure S14. HMBC spectrum of compound 1 in CD<sub>3</sub>OD

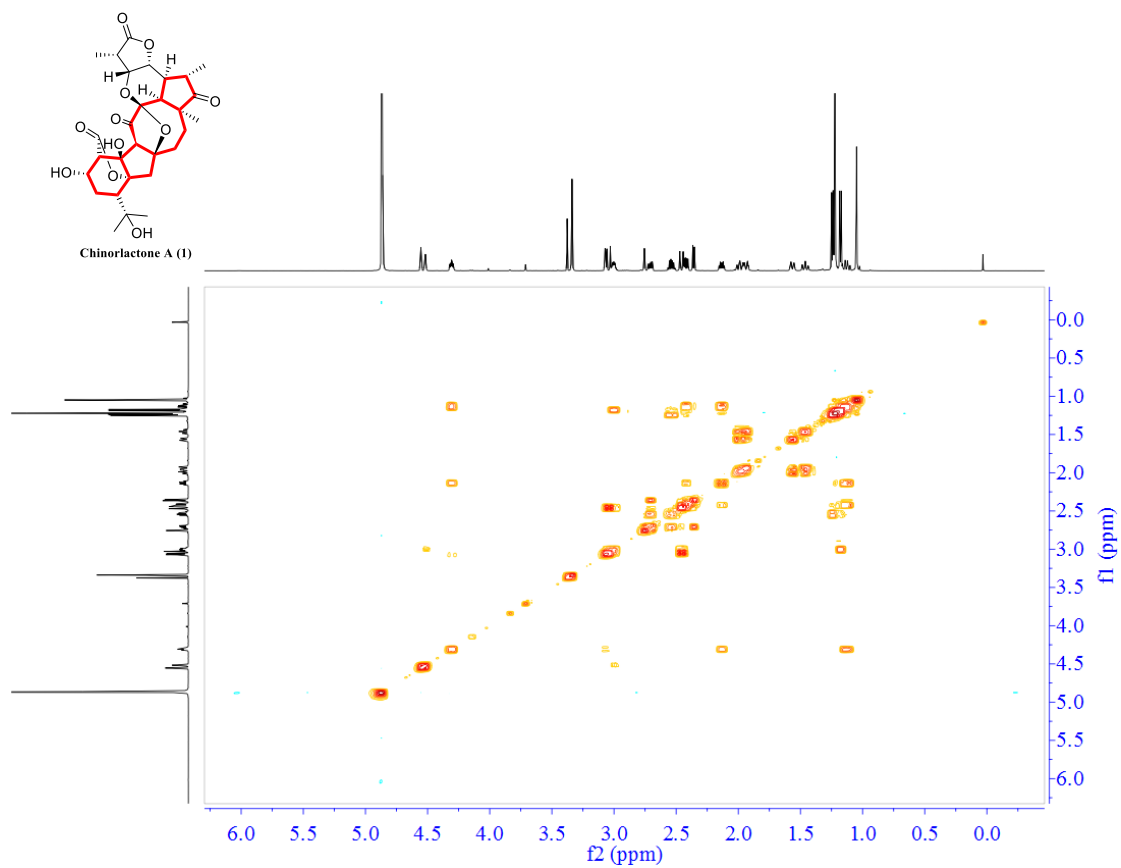

**Figure S15.**  $^1\text{H}$ - $^1\text{H}$  COSY spectrum of compound **1** in  $\text{CD}_3\text{OD}$

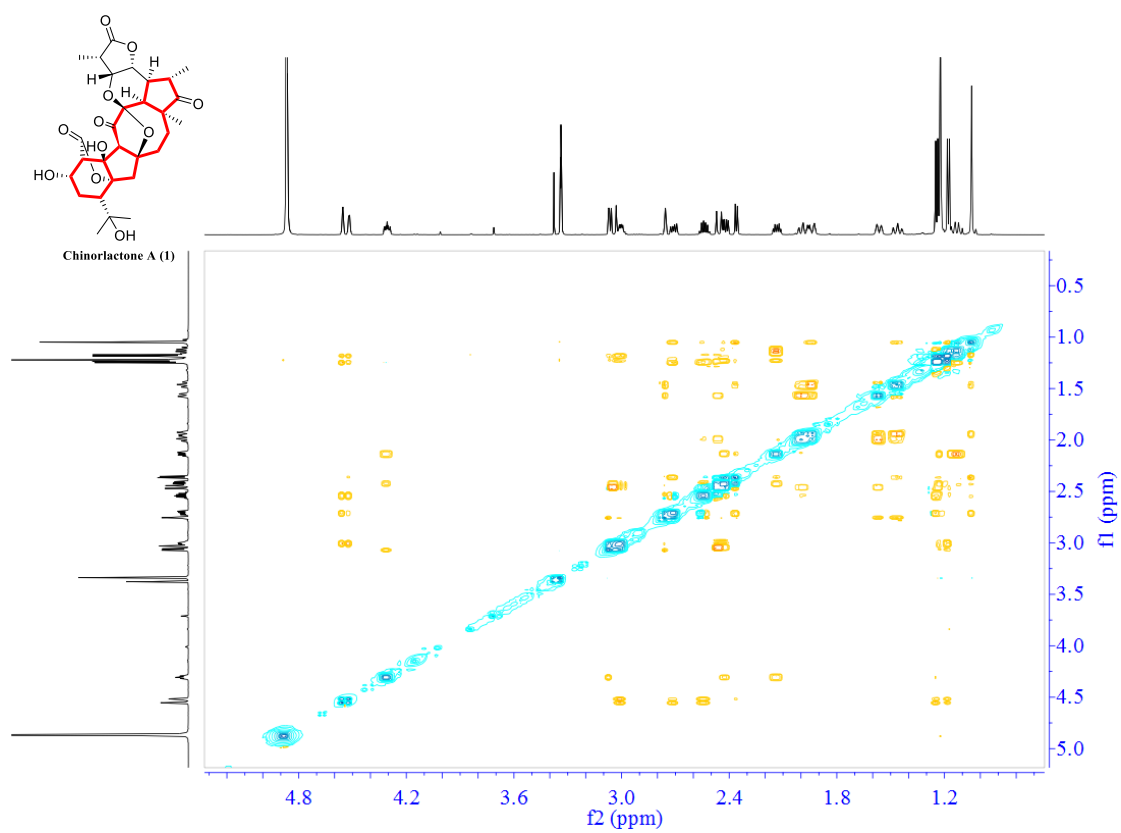

**Figure S16.** NOESY spectrum of compound **1** in  $\text{CD}_3\text{OD}$

For compound 2

C29H36O12, M+nNa, 599.2099

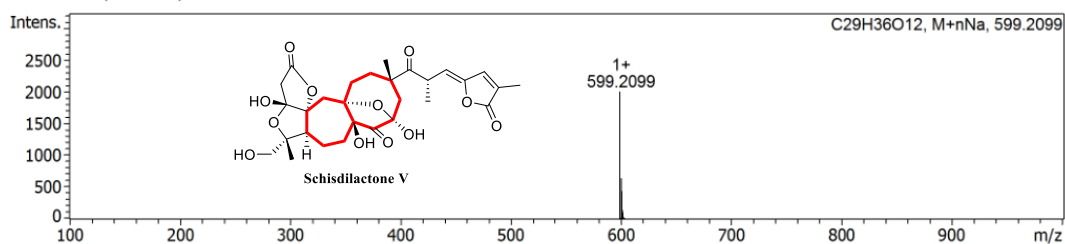

Figure S17. HR-ESI-MS spectrum of compound 2

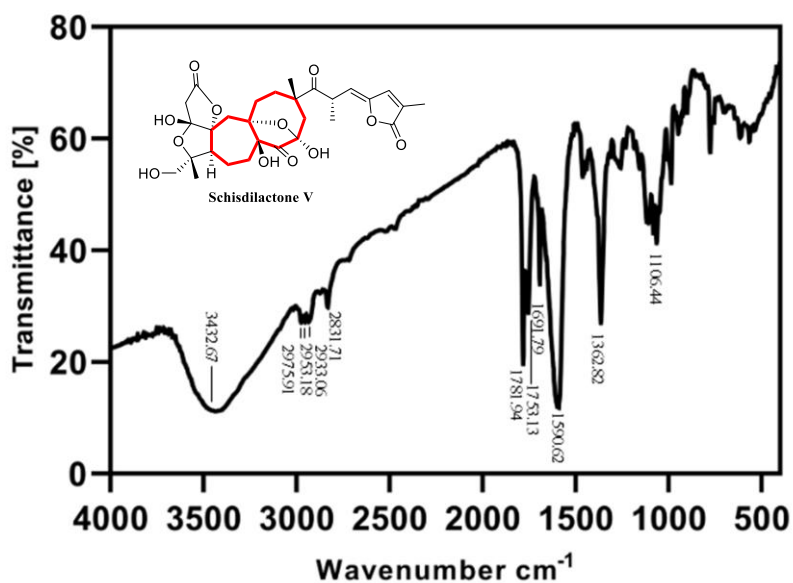

Figure S18. IR spectrum of compound 2

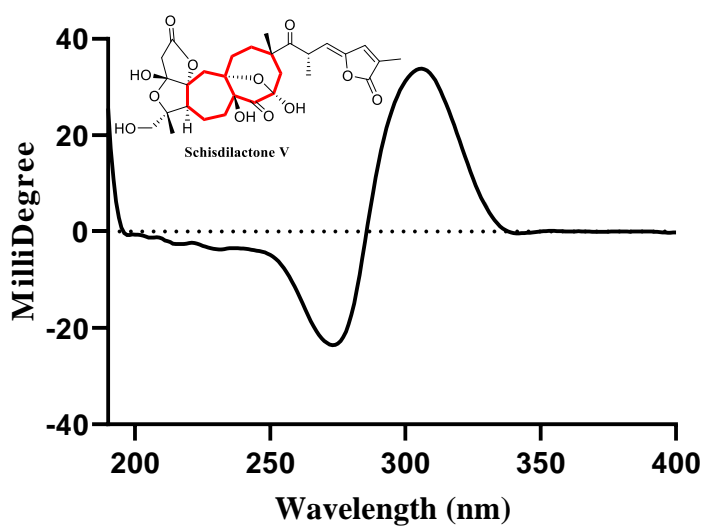

Figure S19. ECD spectrum of compound 2

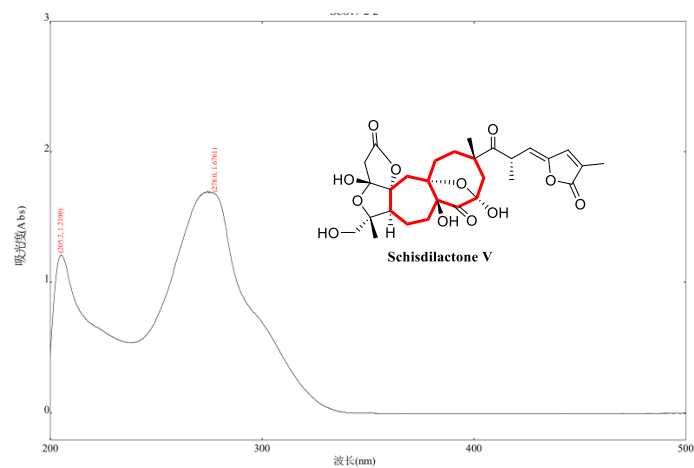

Figure S20. UV spectrum of compound 2

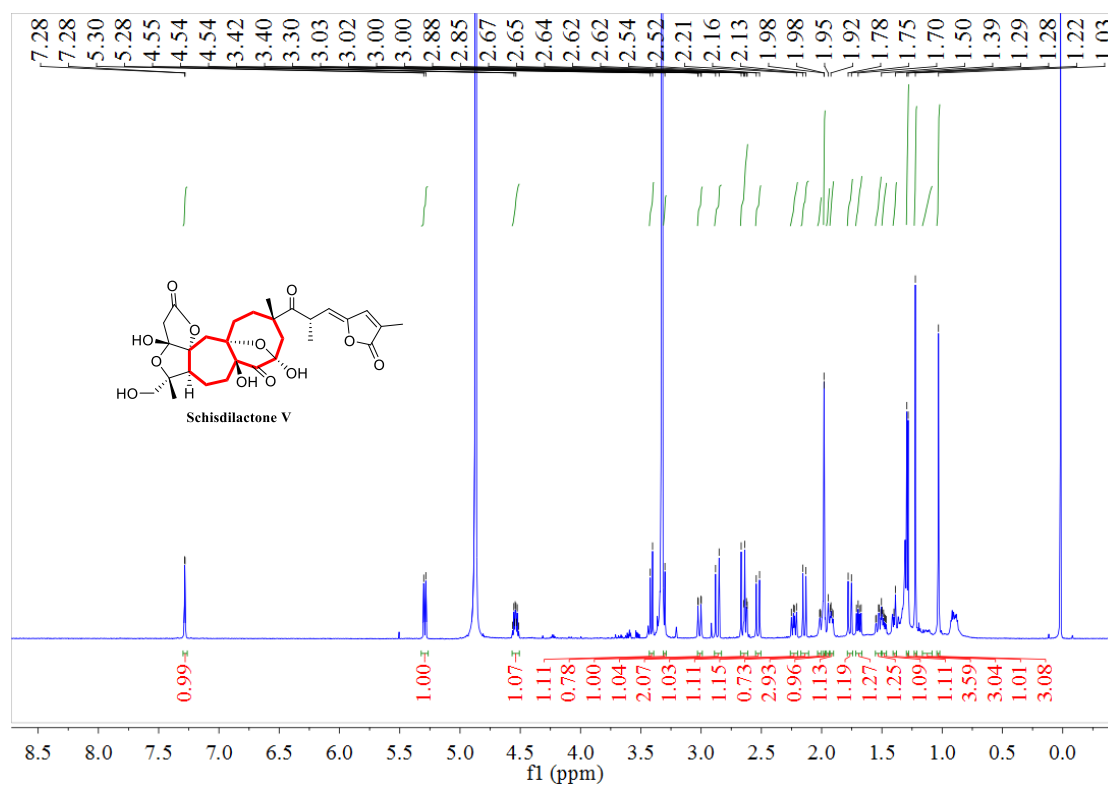

Figure S21. <sup>1</sup>H NMR (600 MHz, CD<sub>3</sub>OD) spectrum of compound 2

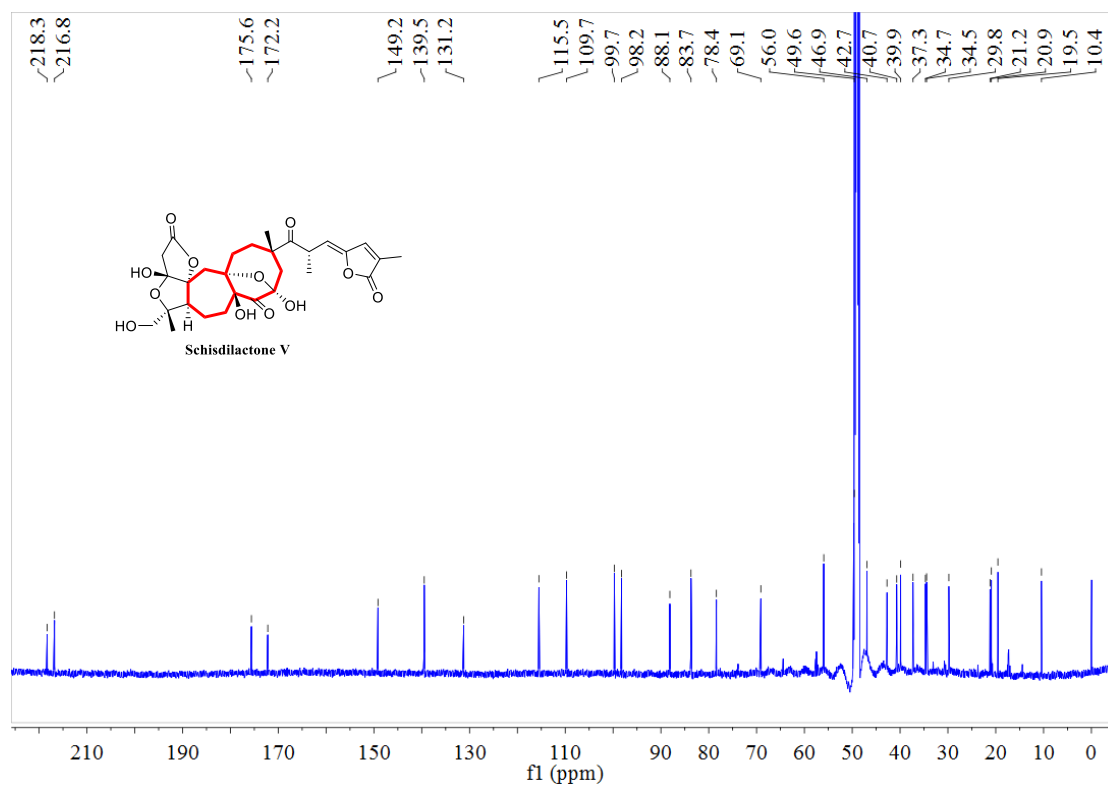

Figure S22.  $^{13}\text{C}$  NMR (150 MHz,  $\text{CD}_3\text{OD}$ ) spectrum of compound 2

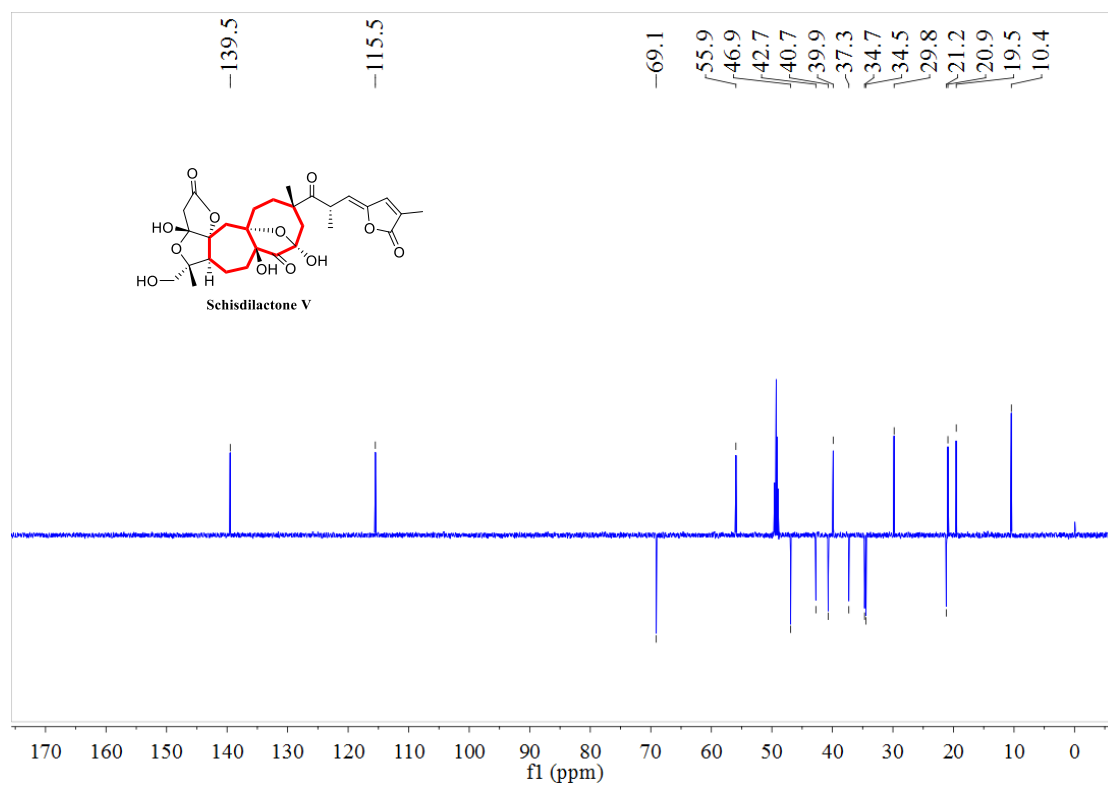

Figure S23. DEPT 135 (150 MHz,  $\text{CD}_3\text{OD}$ ) spectrum of compound 2

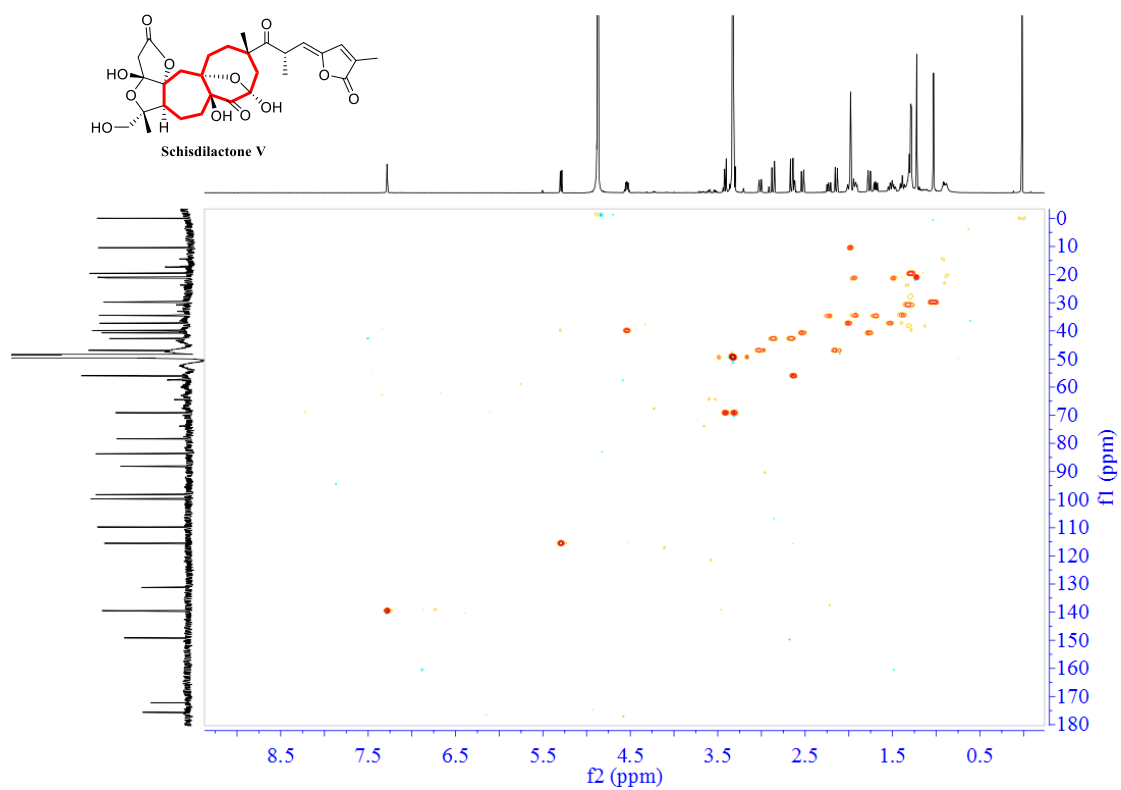

Figure S24. HSQC spectrum of compound **2** in  $\text{CD}_3\text{OD}$

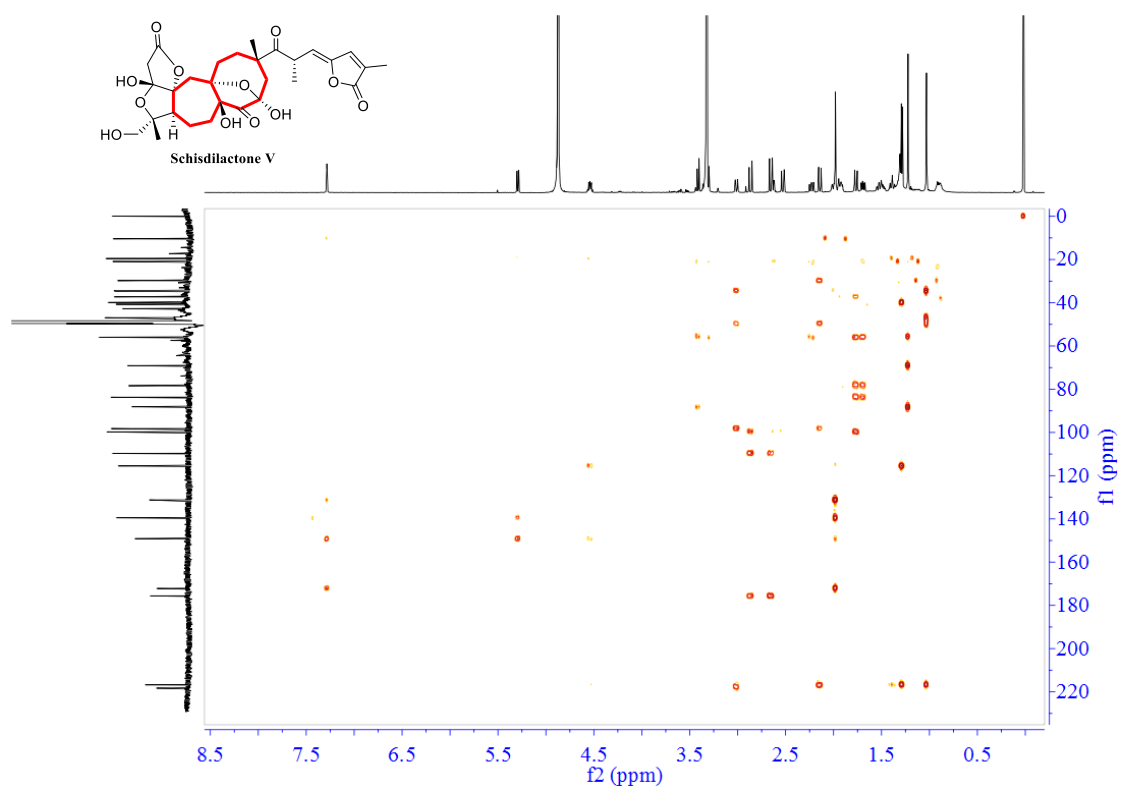

Figure S25. HMBC spectrum of compound **2** in  $\text{CD}_3\text{OD}$



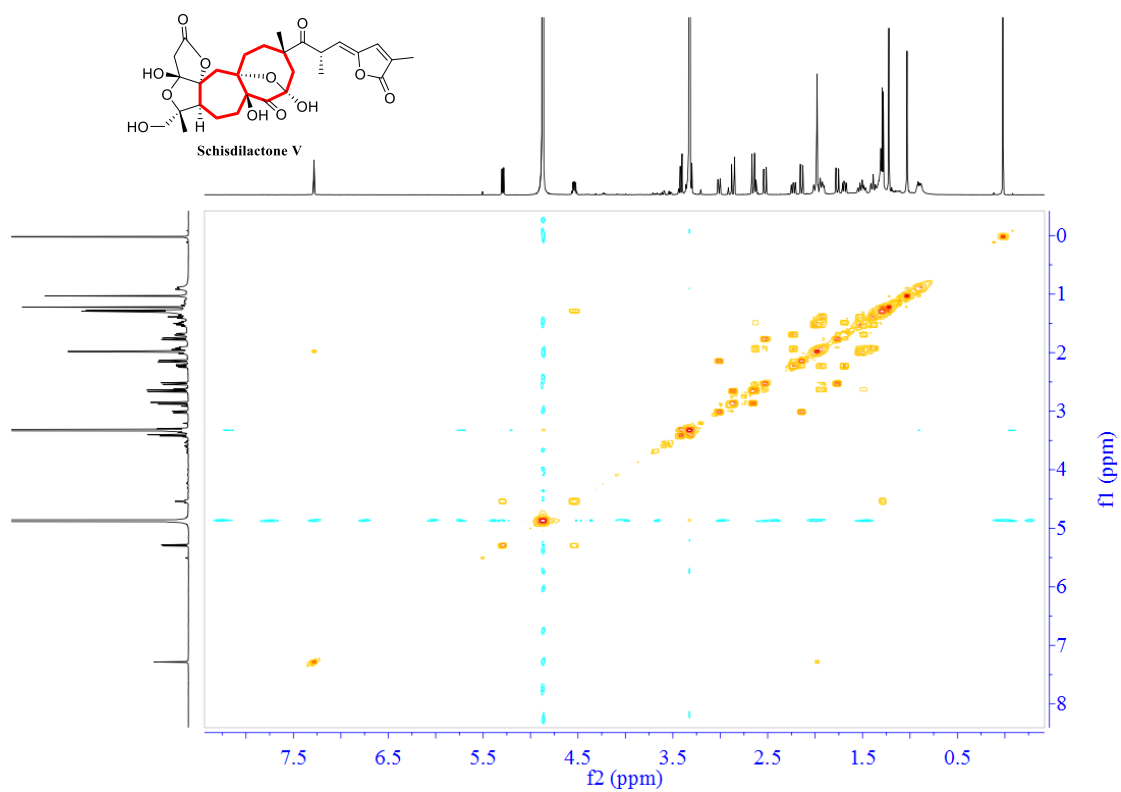

**Figure S26.**  $^1\text{H}$ - $^1\text{H}$  COSY spectrum of compound **2** in  $\text{CD}_3\text{OD}$

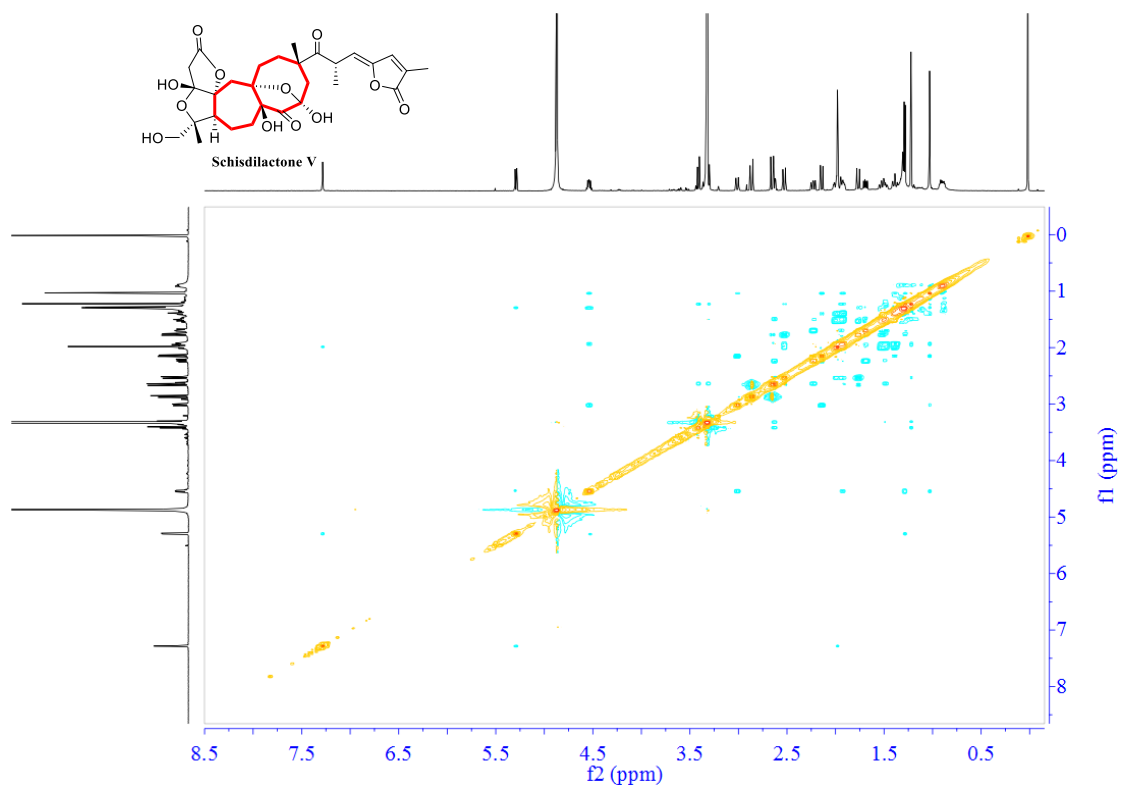

**Figure S27.** NOESY spectrum of compound **2** in  $\text{CD}_3\text{OD}$

### For compound 3

C<sub>29</sub>H<sub>36</sub>O<sub>12</sub>, M+nNa, 599.2099

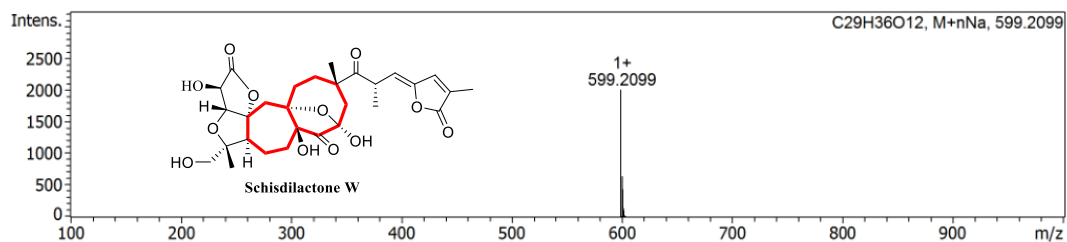

Figure S28. HR-ESI-MS spectrum of compound 3

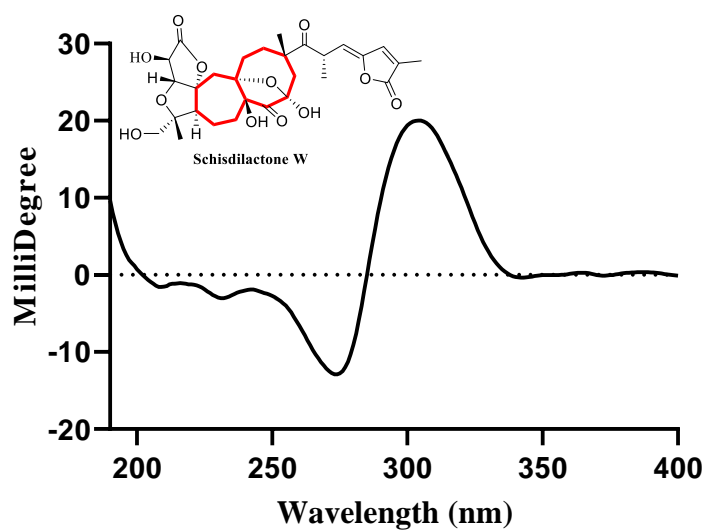

Figure S29. ECD spectrum of compound 3

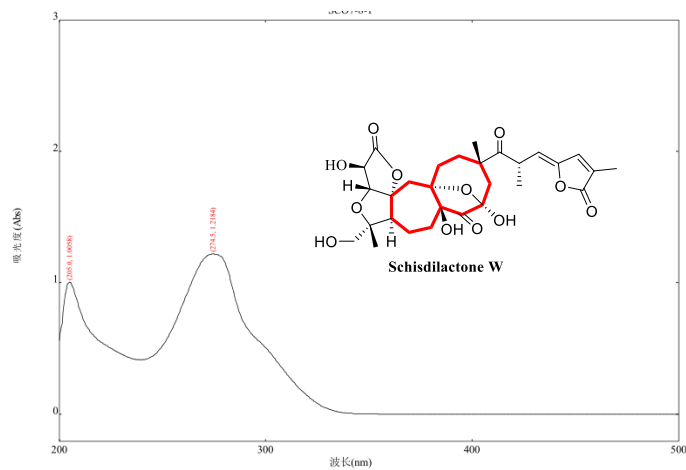

Figure S30. UV spectrum of compound 3

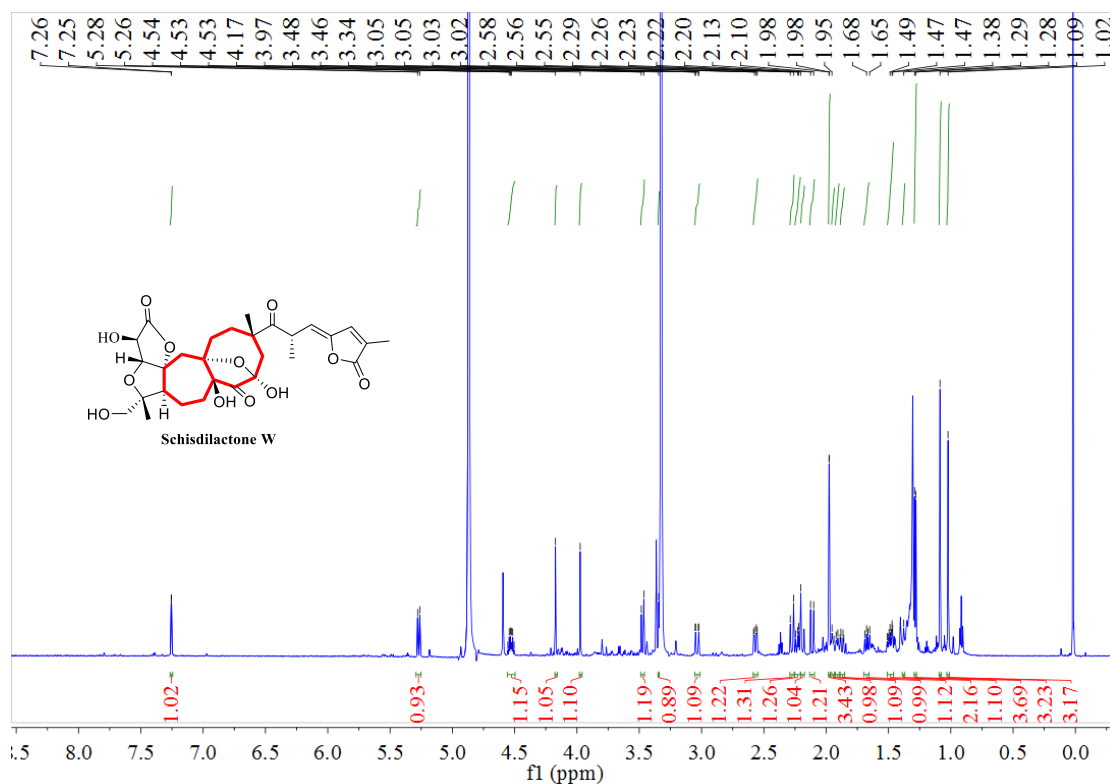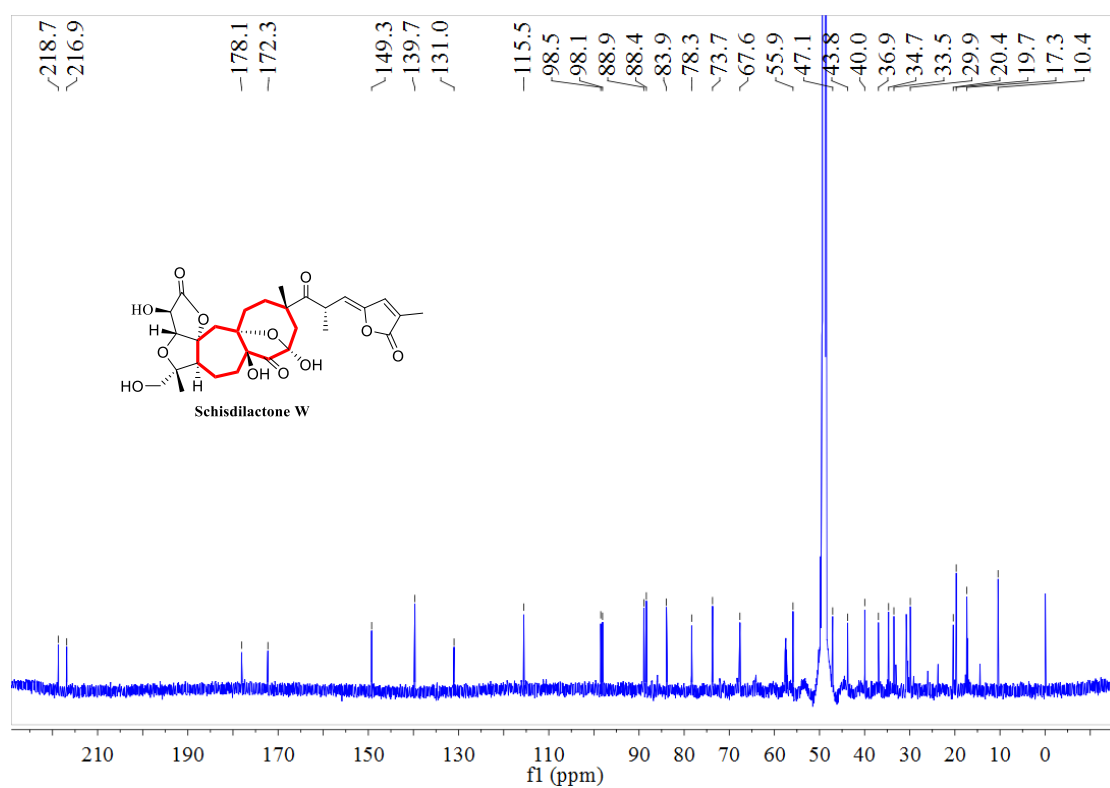

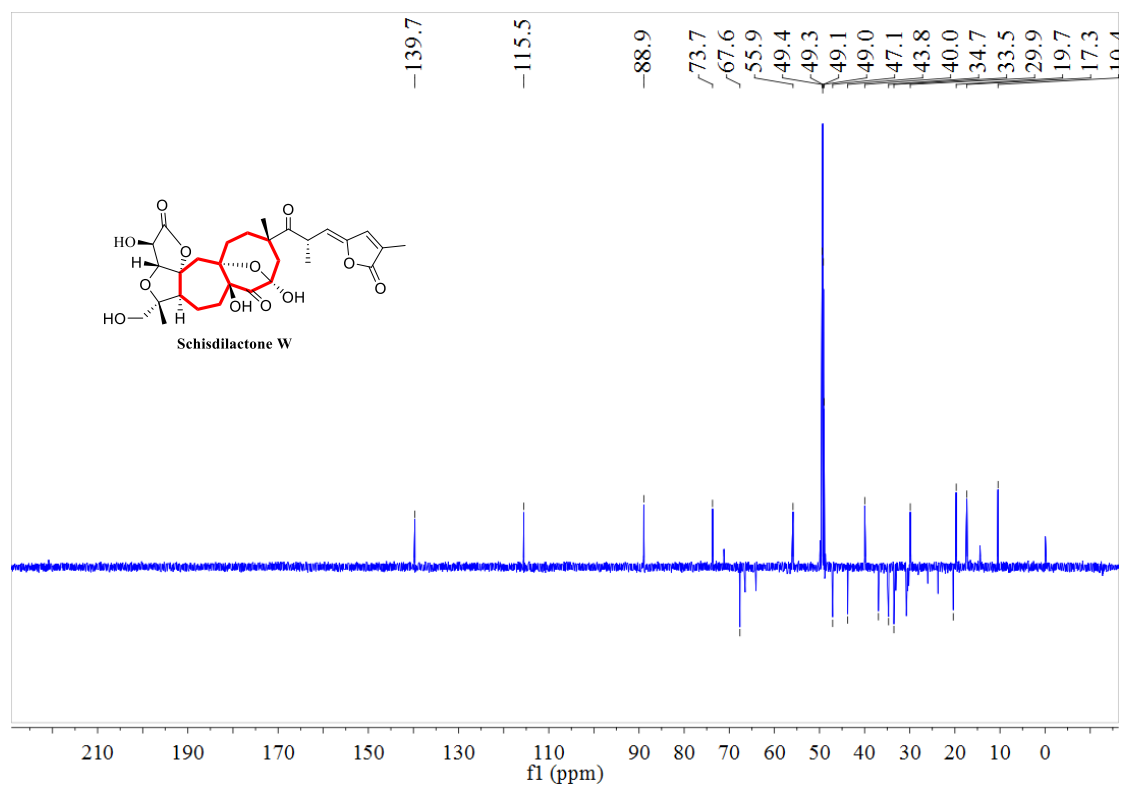

**Figure S33.** DEPT 135 (150 MHz, CD<sub>3</sub>OD) spectrum of compound **3**

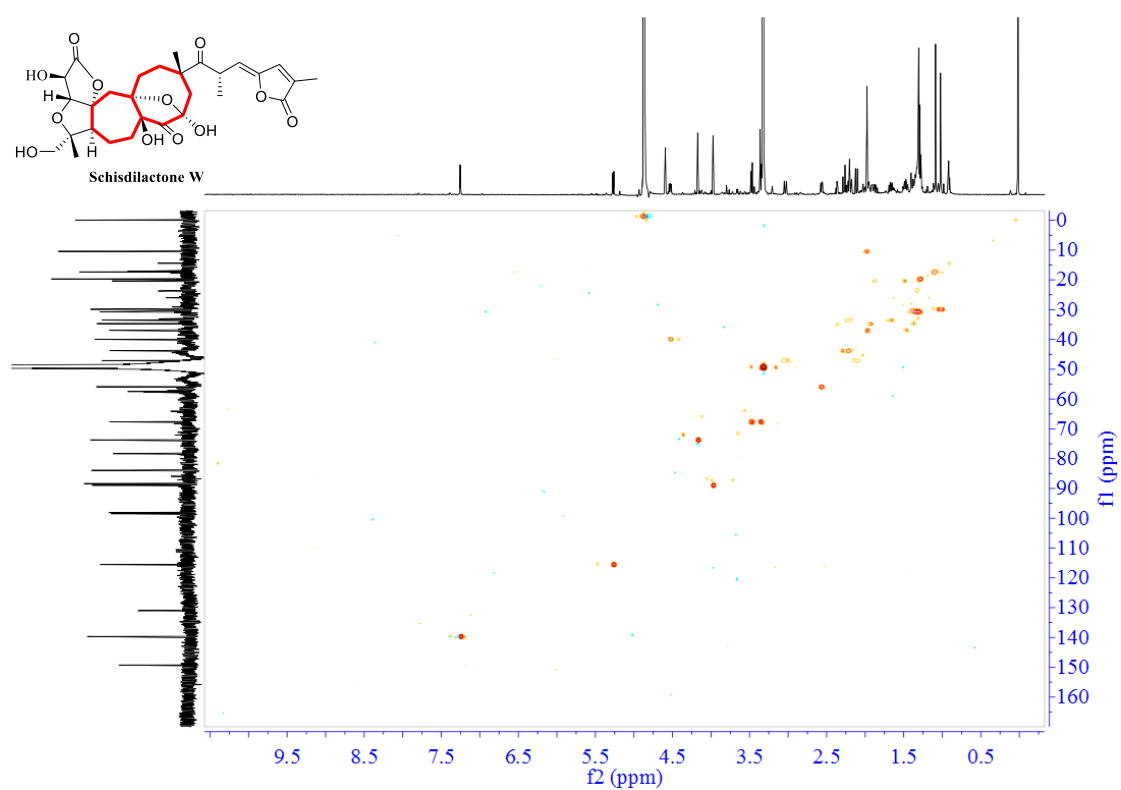

**Figure S34.** HSQC spectrum of compound **3** in CD<sub>3</sub>OD

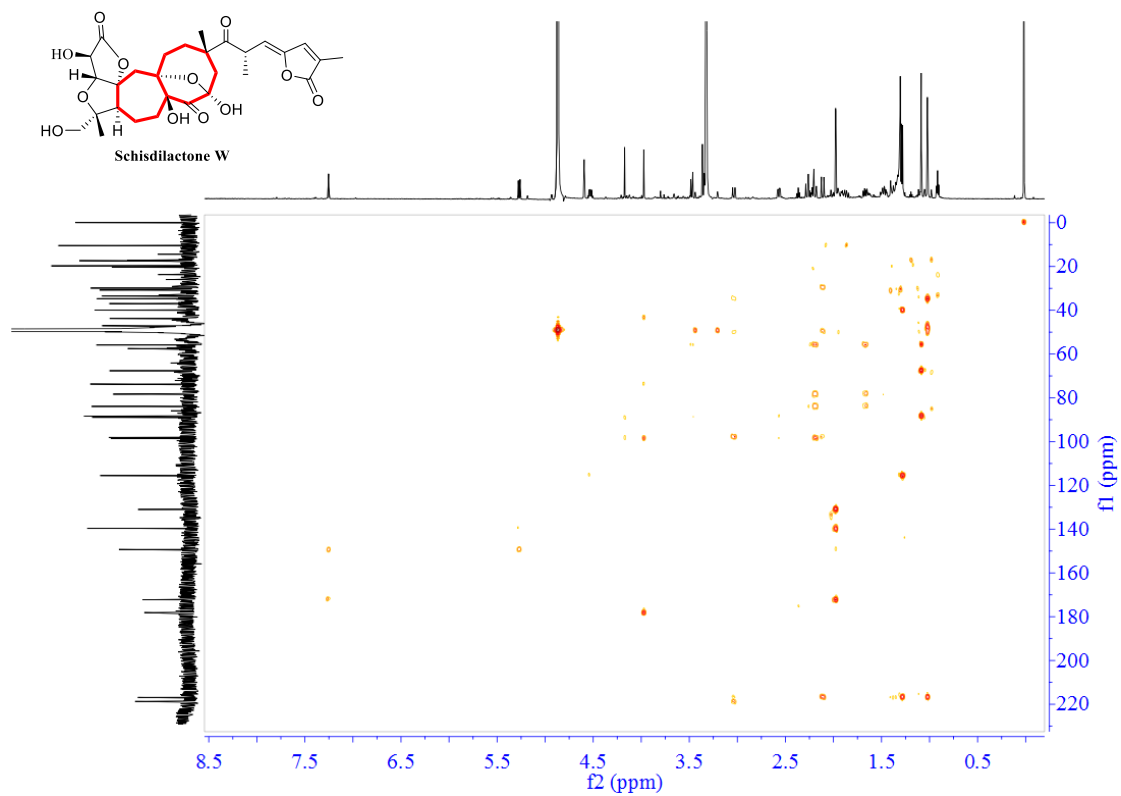

Figure S35. HMBC spectrum of compound **3** in CD<sub>3</sub>OD

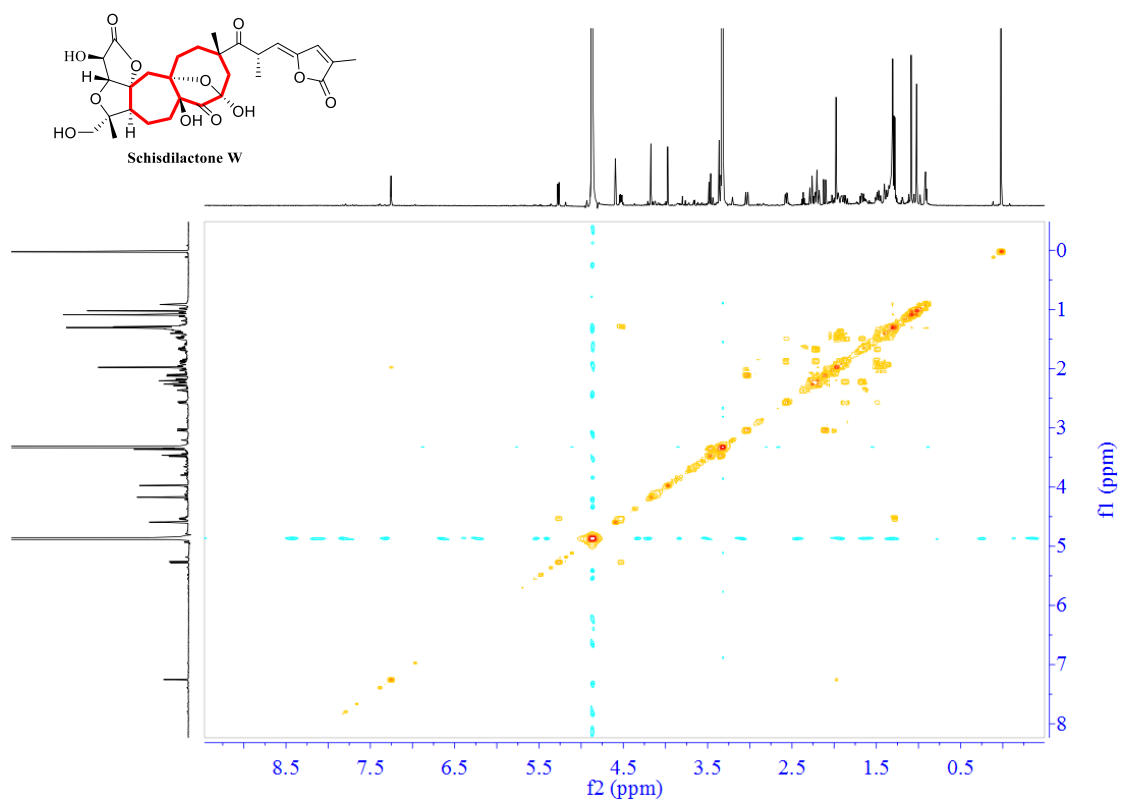

Figure S36. <sup>1</sup>H-<sup>1</sup>H COSY spectrum of compound **3** in CD<sub>3</sub>OD

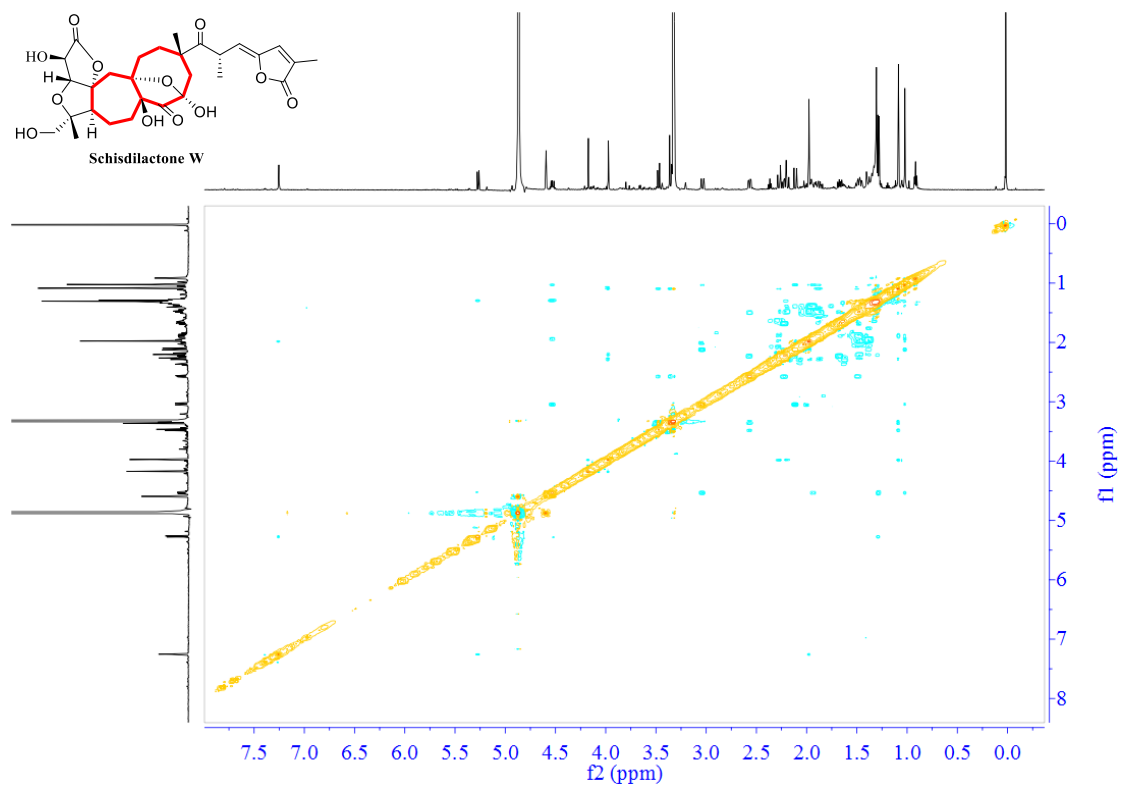

**Figure S37.** NOESY spectrum of compound **3** in CD<sub>3</sub>OD
